# Supplementary material for: Rapid Isolation of intact Salmonella-containing vacuoles using paramagnetic nanoparticles
Source: Springer Nature journal article supplement (doi:10.1186/s13099-018-0256-7), 2018-07-31

Additional file 1.

Figure S 1.

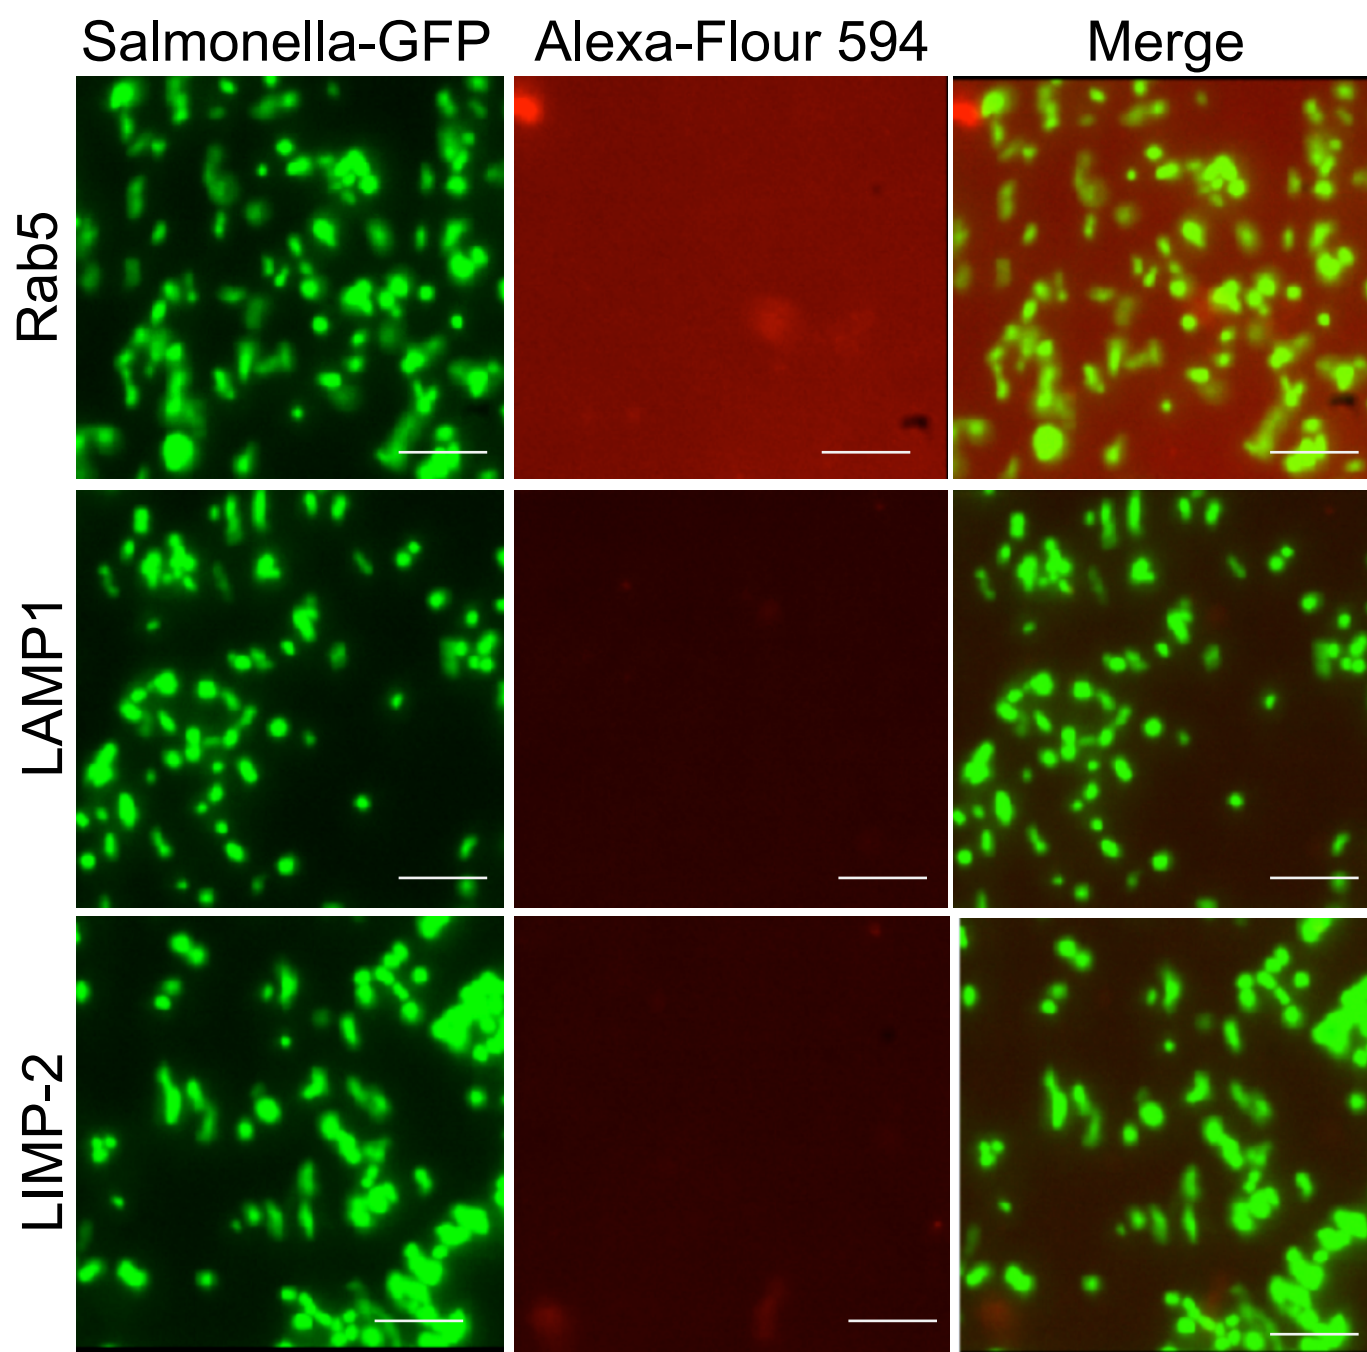

Supplement: MOESM1 [file 15991954]
